# Supplementary material
Source: PubMed Central journal article supplement (PMC1914171)

**Mean**

Correlation (R) indicated for :  
 Ril1  
 /e subpopulation  
 /e subpopulation

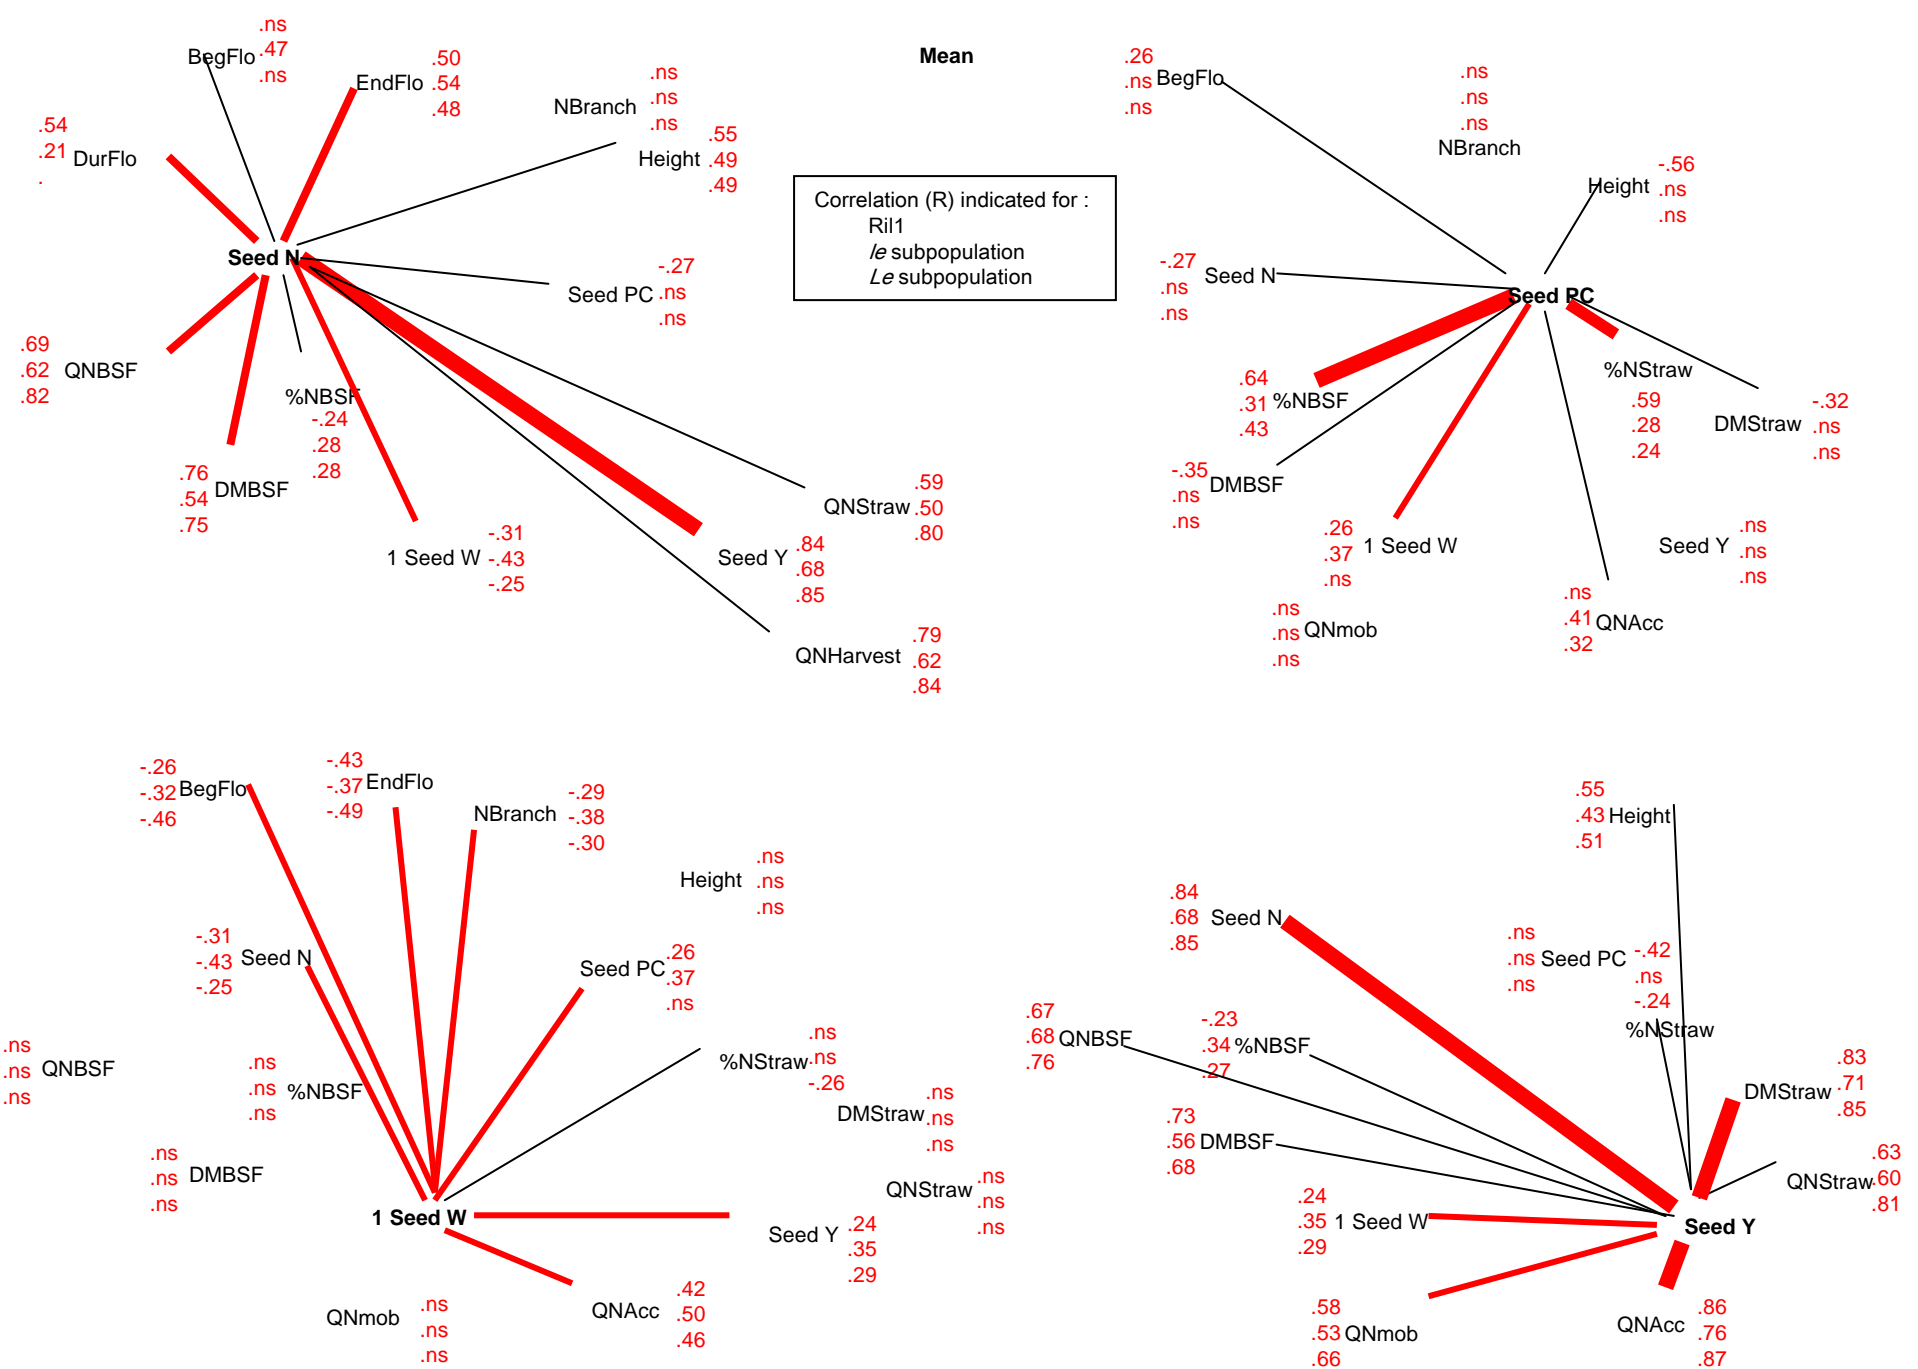

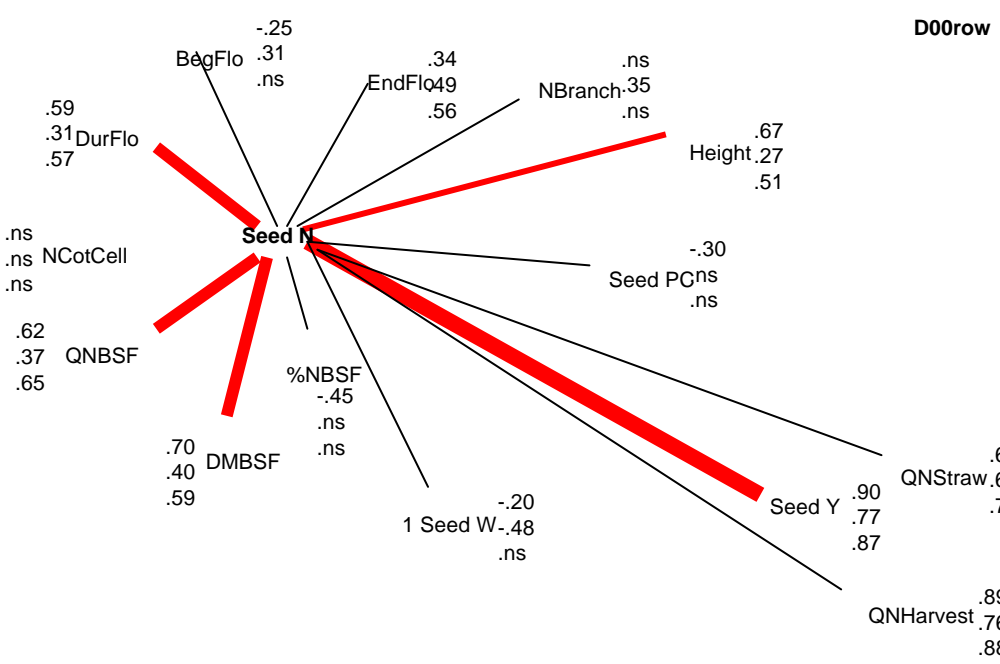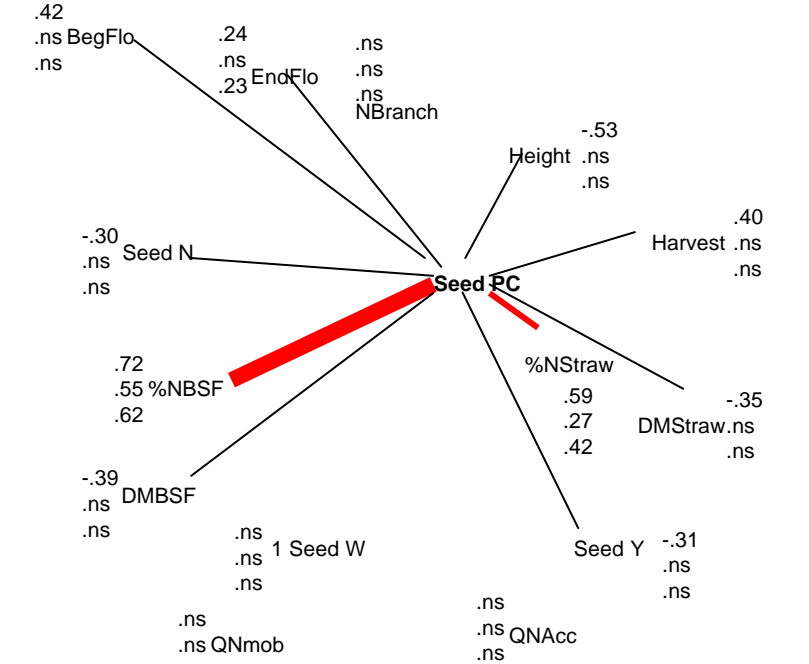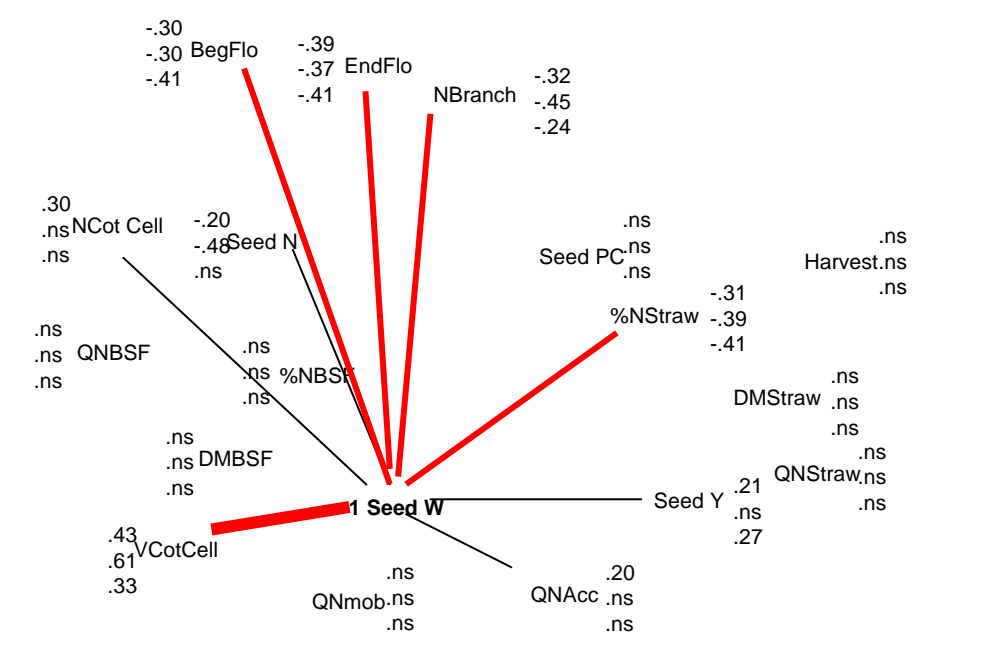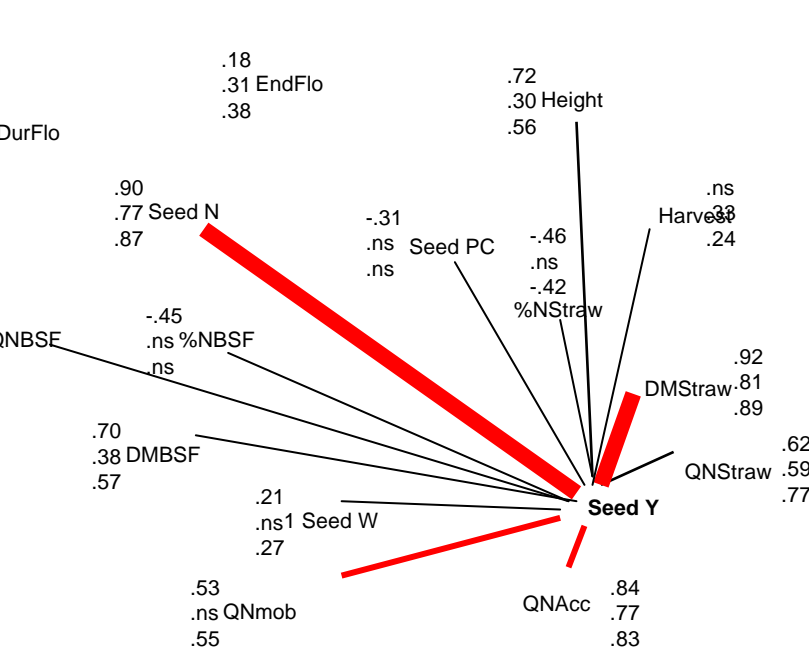

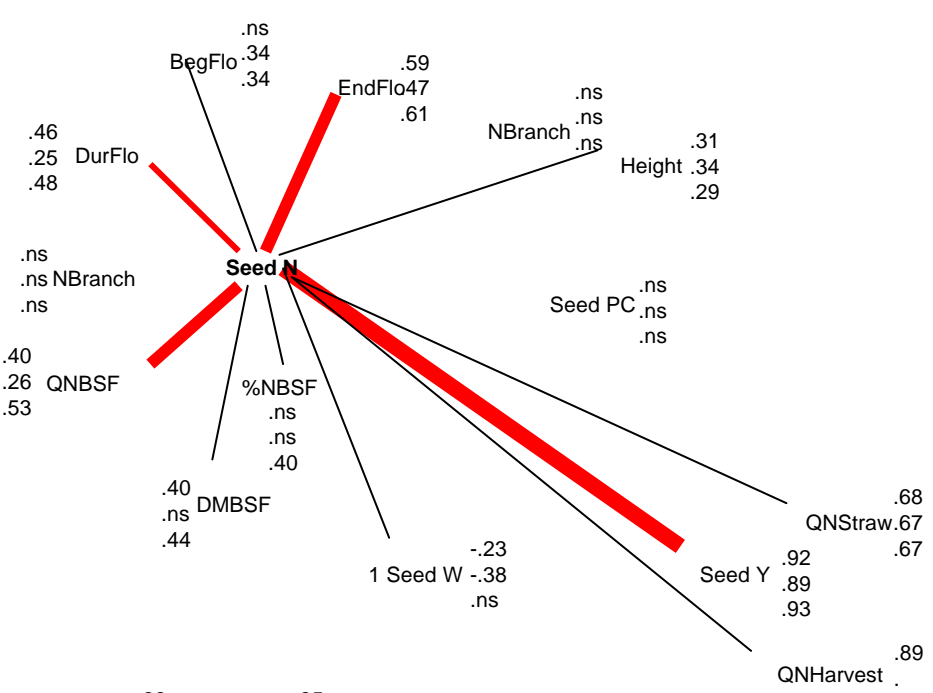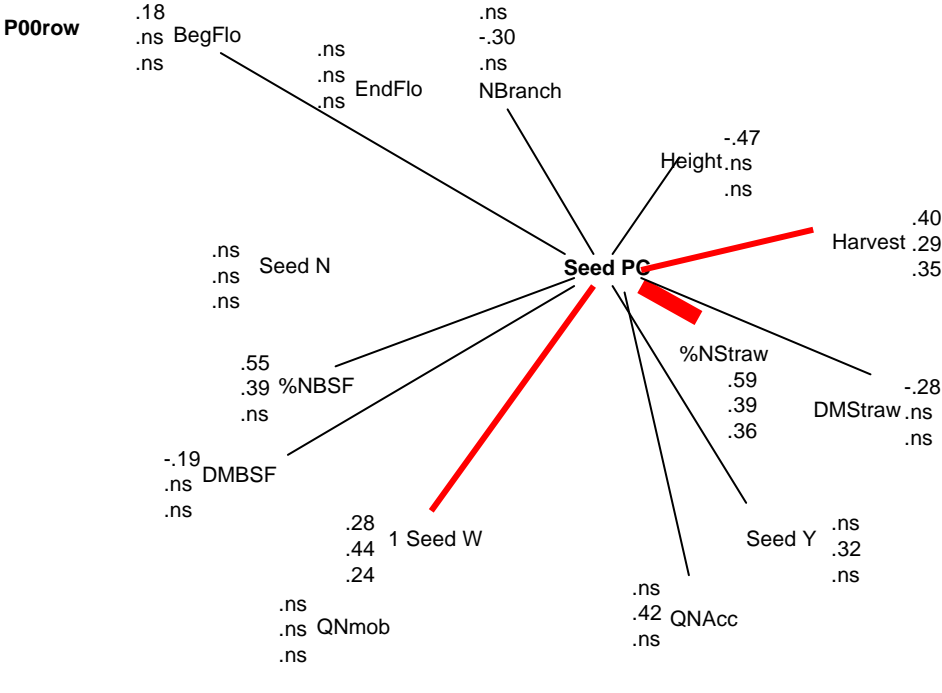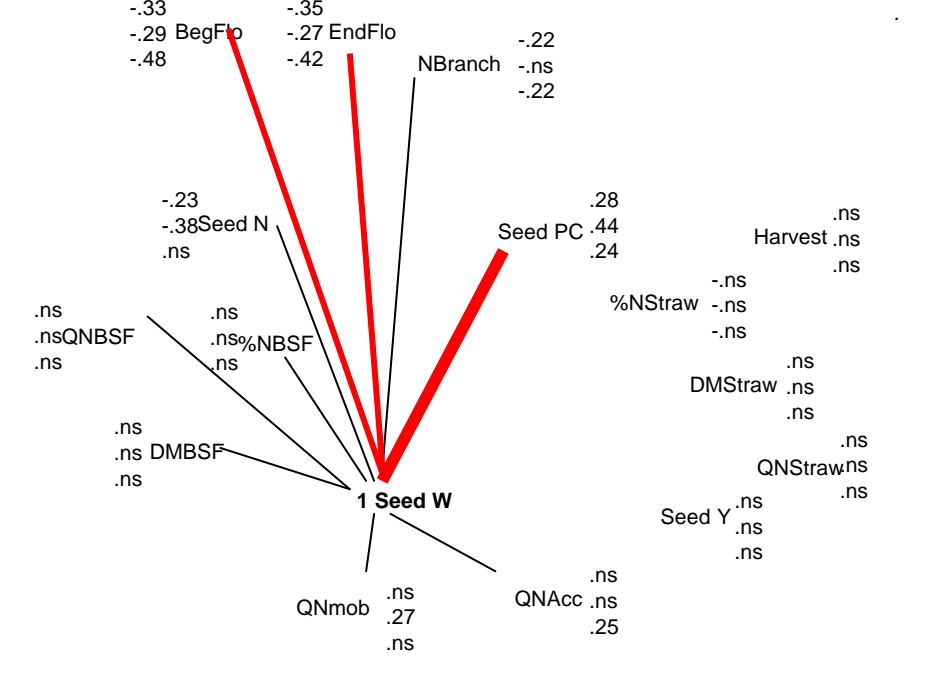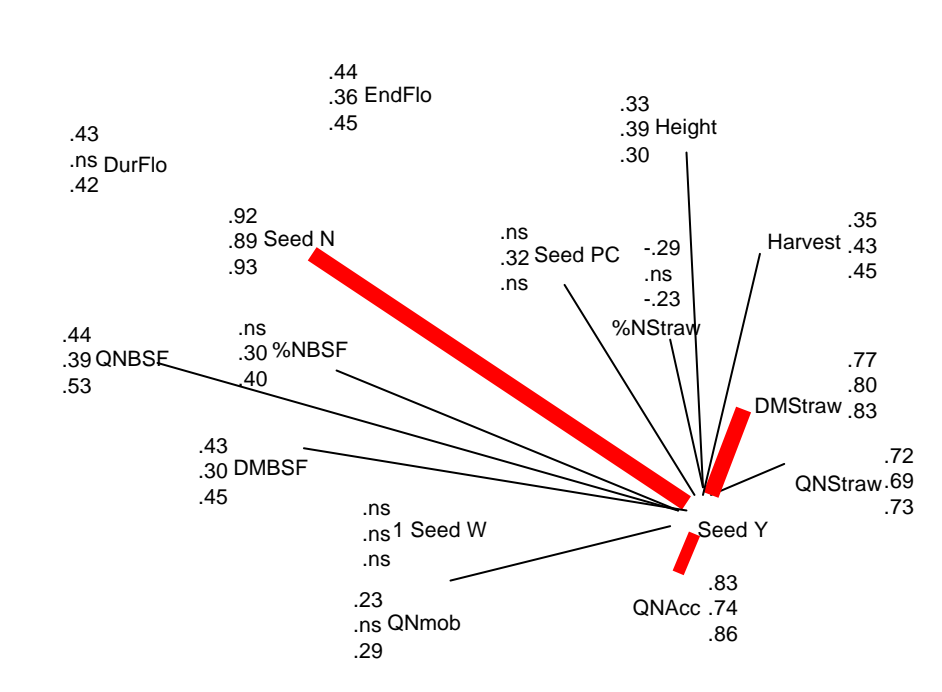



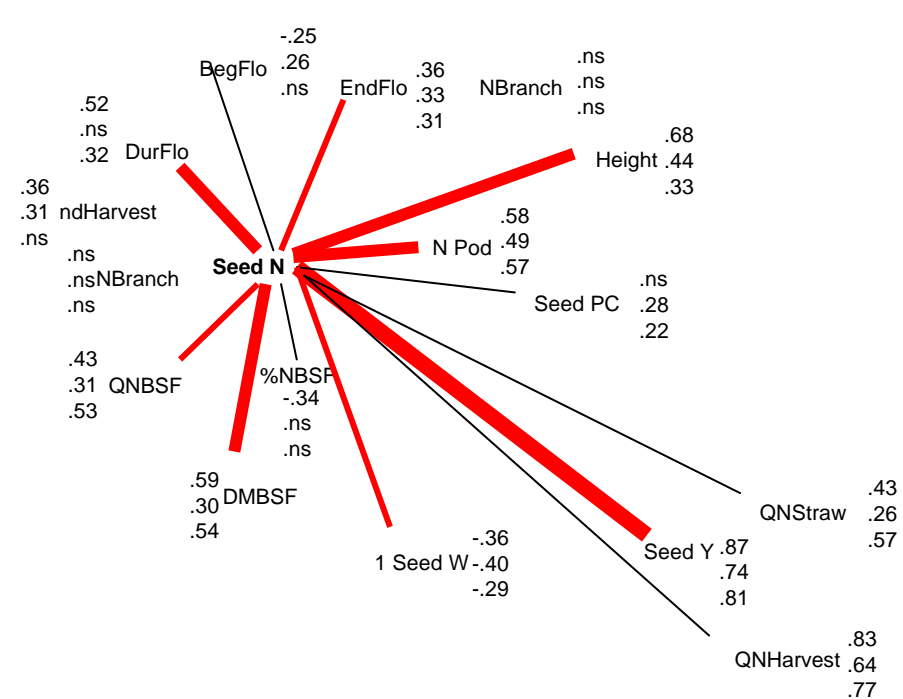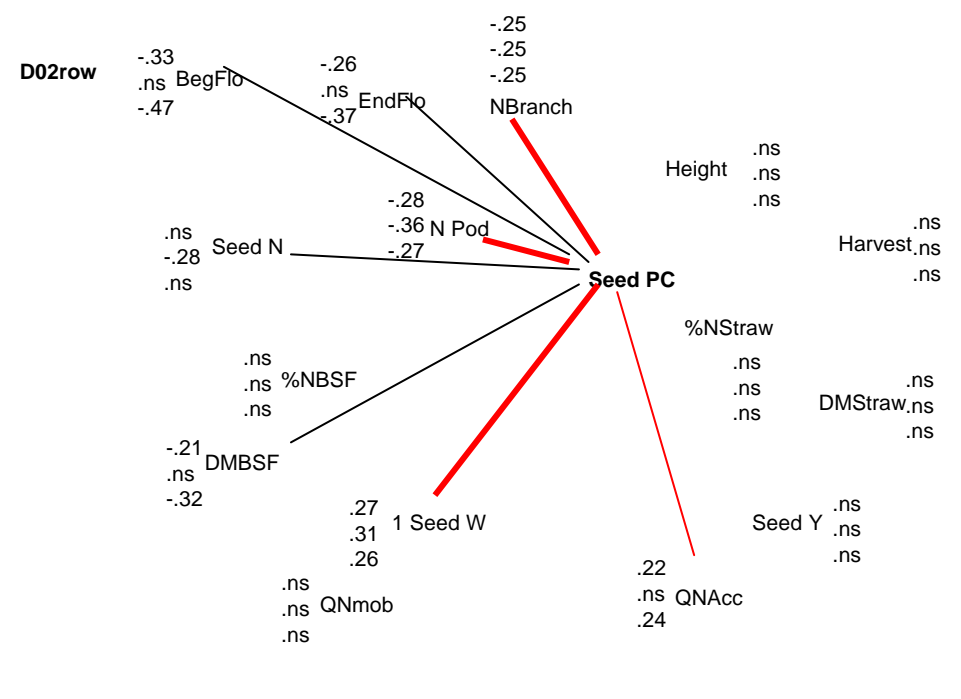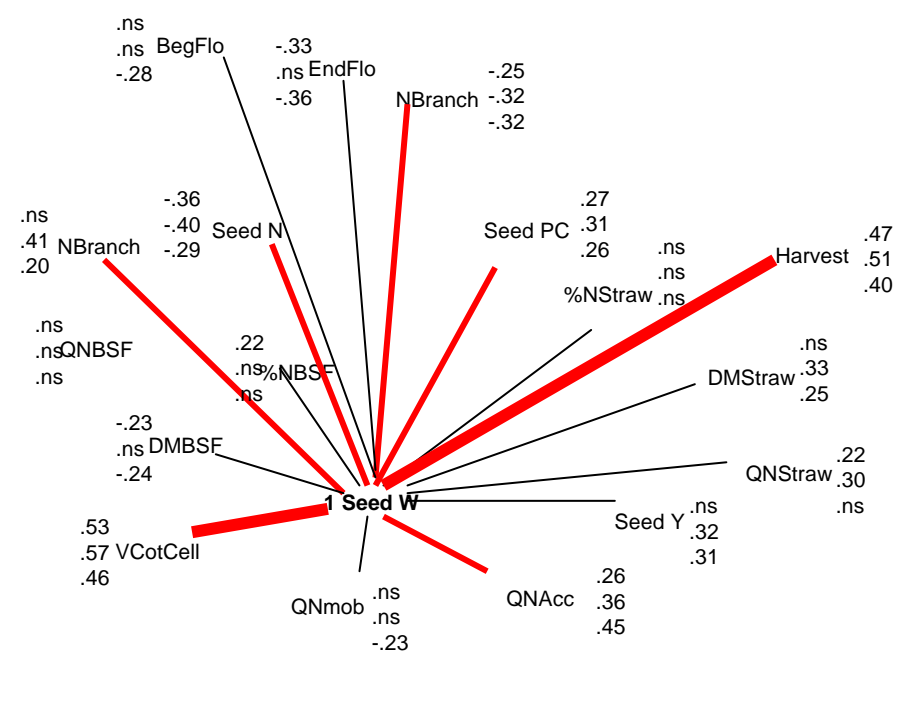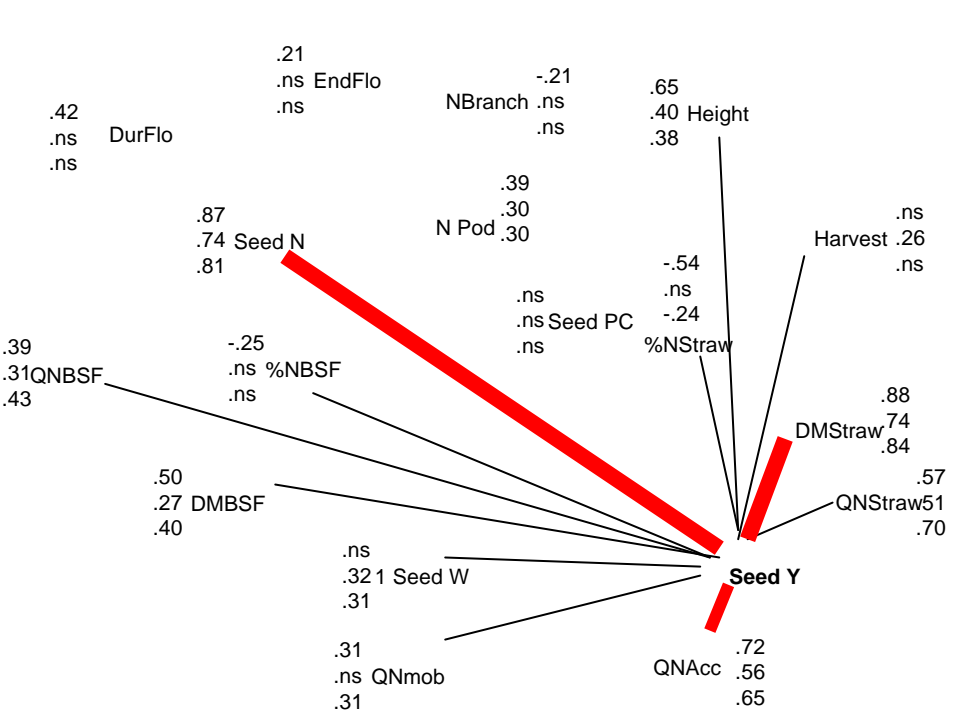

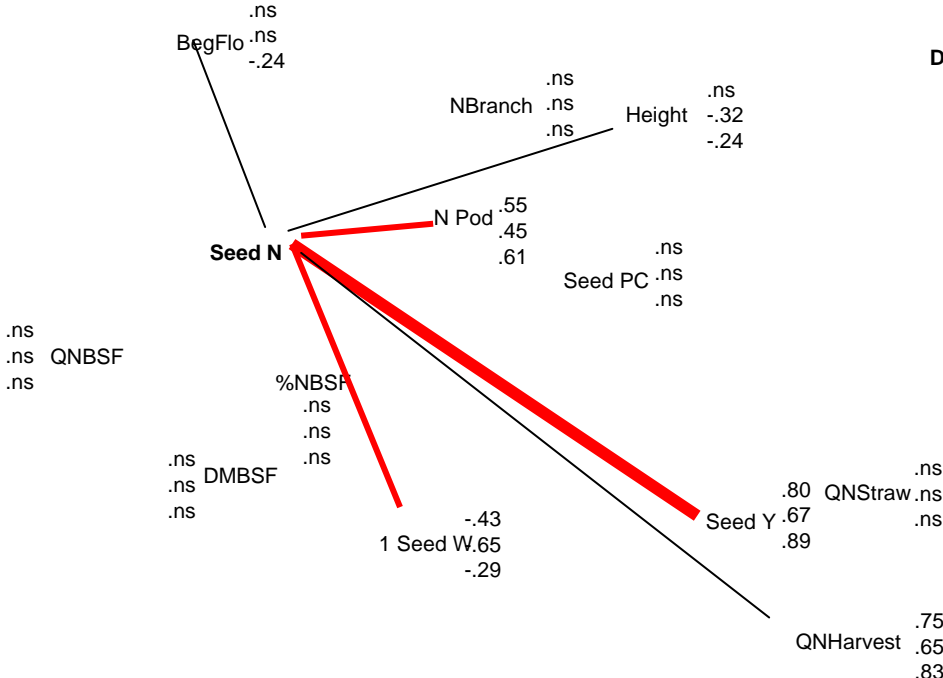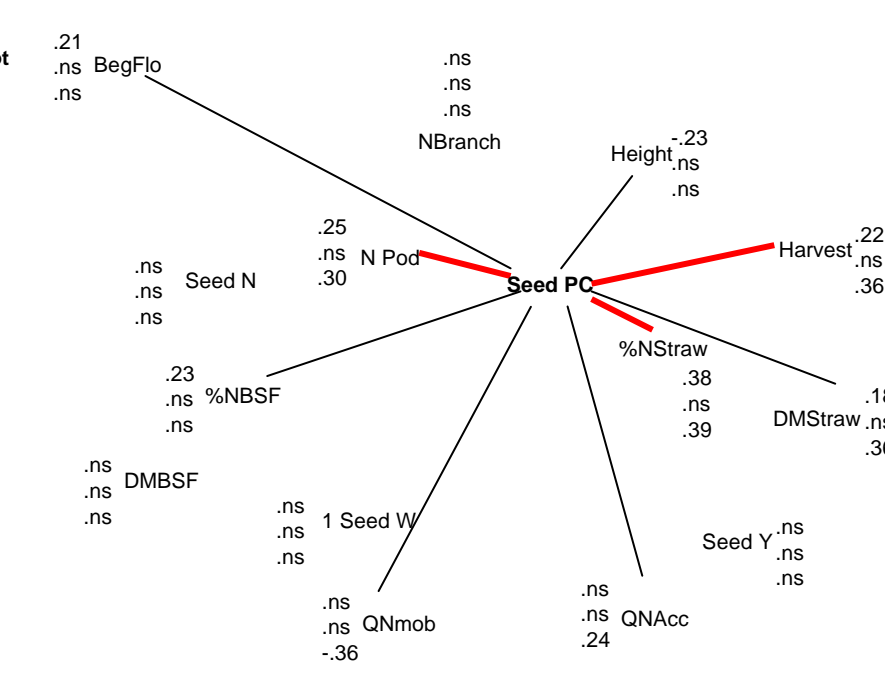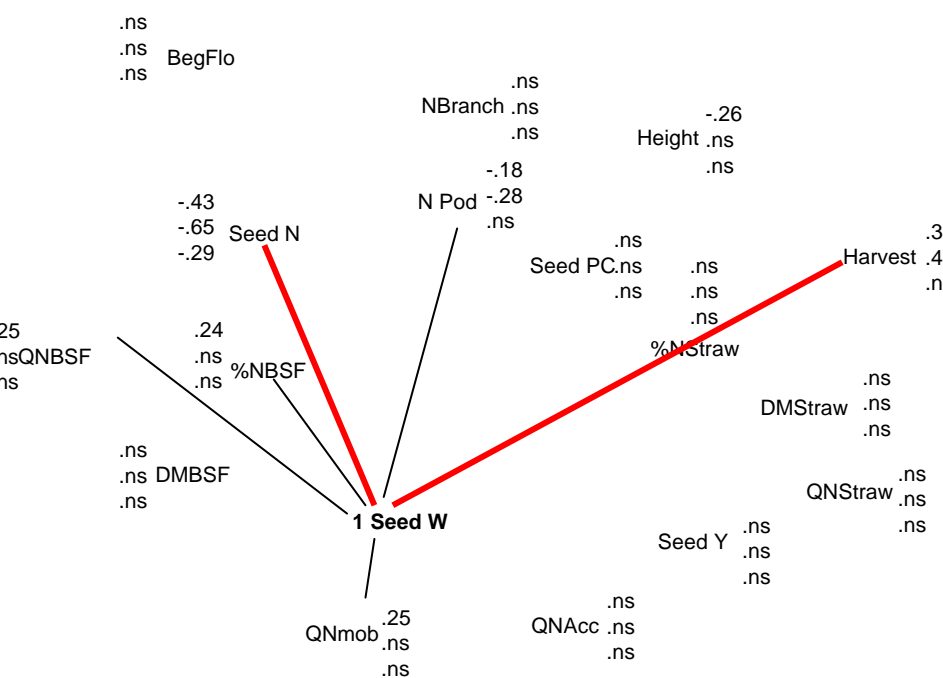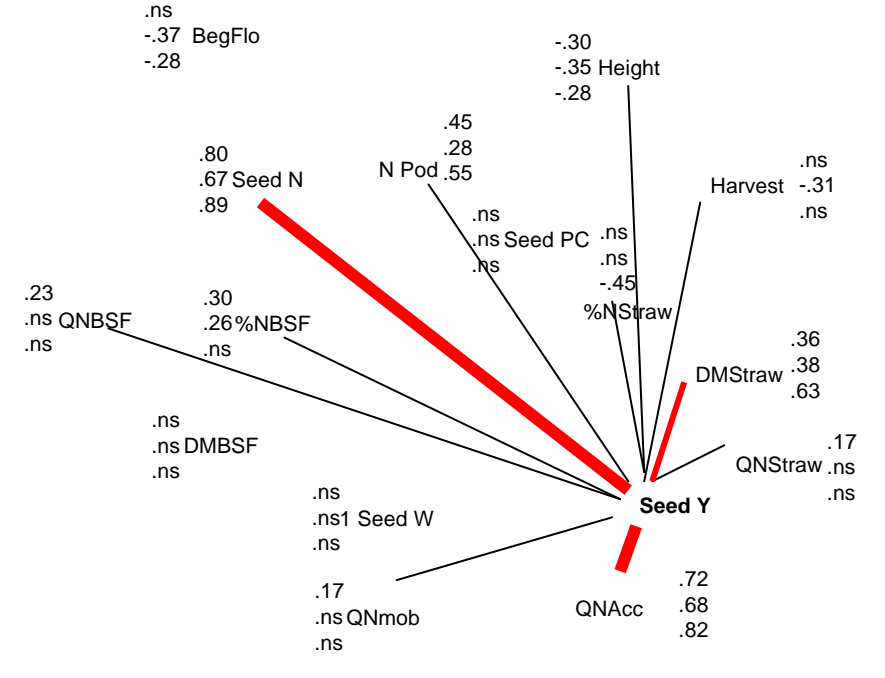

Supplement: plntphys_pp.107.096966_1.pdf [file plntphys_pp.107.096966_1.pdf]
